# Supplementary material
Source: PubMed Central journal article supplement (PMC6110081)
Supplement: NIHMS980260-supplement-4.pdf [file NIHMS980260-supplement-4.pdf]

# Supplemental Information

Fig S1

Composition of G&R, loops and turns at each position within each cluster. Hatched bars indicate statistically significant differences between OMBBs and G&R based on permutation tests (see Methods); statistically significant values cannot be shown when the proportion is 0. Groups are colored as for the sequence logos of Fig 2,4 and 5.

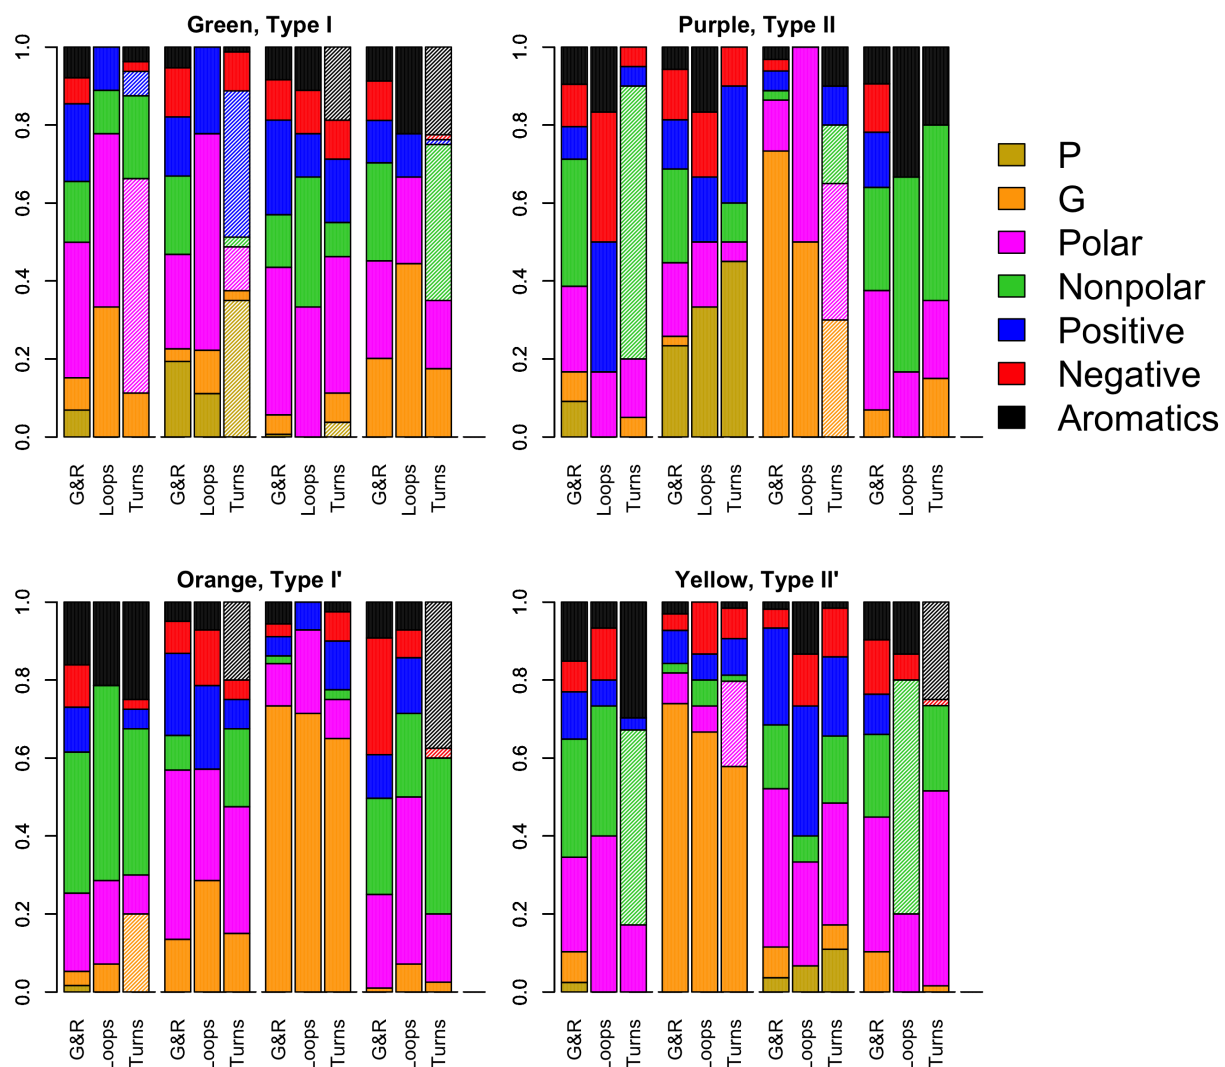

**Fig S2**

The proportion of backbone:backbone hydrogen bonding at each pair of positions. The carbonyl partner is shown along the x-axis; the identity of the other backbone partner is shown along the y-axis. “Other” indicates hydrogen bonding to a backbone partner outside the loop. The radius of the circles is equivalent to the proportion of structures at that position involved in bonding. Circles are colored to match the clusters marked on the Ramachandran plots in Figs 2, 4 and 5. A large circle at both  $i:i+3$  and  $i+3:i$ , for example, would indicate the likelihood of a double hydrogen bond, while a circle in just one position indicates a single hydrogen bond.

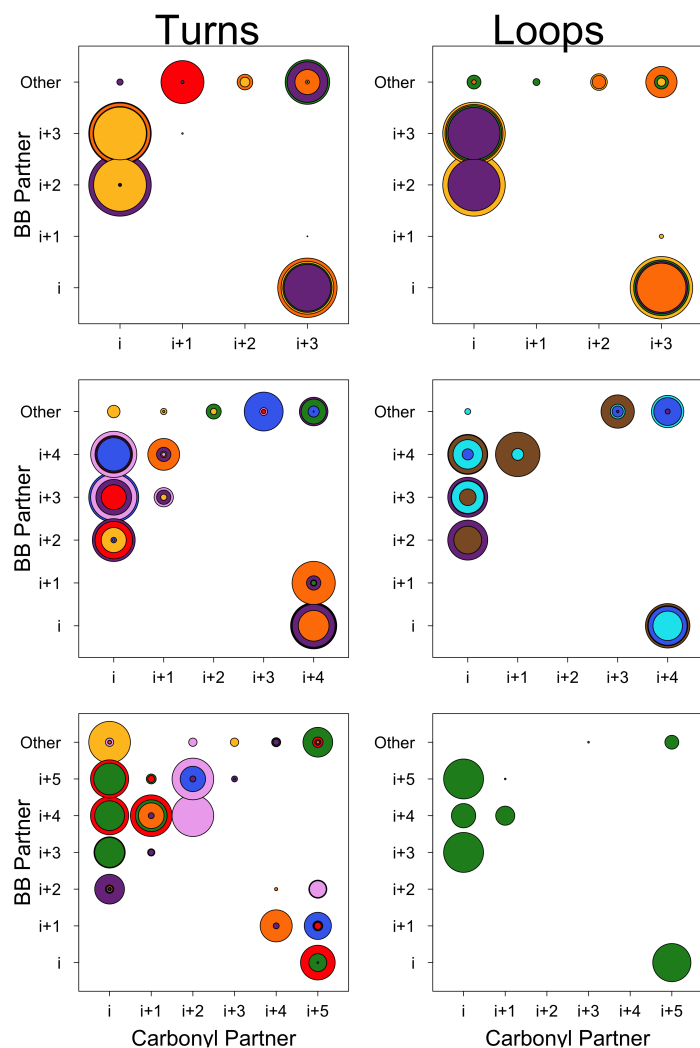

**Fig S3**

Proportion of sidechain:backbone hydrogen bonding of all positions and strand connector lengths. The x-axis shows the average van der Waals volume of all residues at that position, regardless of polarity.

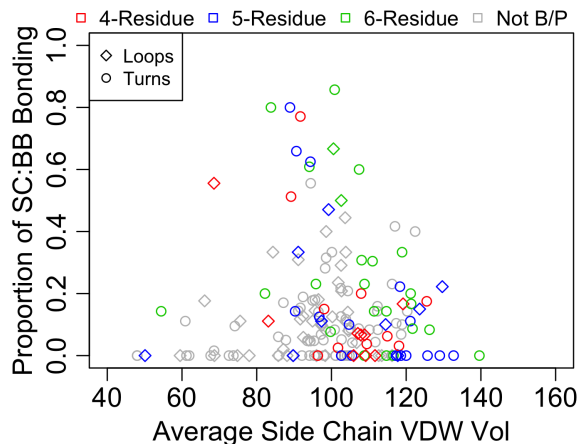**Table S1**

For each length, the cluster assignments were permuted 10,000 times and the sum of the absolute differences between each pair of groups was calculated. Approximate p-values reported below are the proportion of permutations for which the sum differences was greater than or equal to the observed sum difference. P-values are red when statistically significant after Holm-Bonferroni adjustment for familywise error rates. 6-residues loops are not shown because there is only one cluster identified.

|                  | 4-residue Turns |                  |                  |                  |                  |
|------------------|-----------------|------------------|------------------|------------------|------------------|
|                  | Green, Type I   | Orange, Type I'  | Purple, Type II  | Yellow, Type II' | Red, Unk         |
| Green, Type I    |                 | <b>&lt;1e-04</b> | 0.1243           | <b>&lt;1e-04</b> | <b>&lt;1e-04</b> |
| Orange, Type I'  | NA              | NA               | <b>&lt;1e-04</b> | <b>&lt;1e-04</b> | <b>&lt;1e-04</b> |
| Purple, Type II  |                 |                  |                  | <b>&lt;1e-04</b> | <b>&lt;1e-04</b> |
| Yellow, Type II' | NA              | NA               | NA               | NA               | <b>&lt;1e-04</b> |
| Red, Unk         |                 |                  |                  |                  |                  |

|                  | 4-residue Loops |                 |                 |                  |
|------------------|-----------------|-----------------|-----------------|------------------|
|                  | Green, Type I   | Orange, Type I' | Purple, Type II | Yellow, Type II' |
| Green, Type I    |                 | <b>0.0059</b>   | <b>0.0014</b>   | <b>5e-04</b>     |
| Orange, Type I'  | NA              | NA              | 0.192           | 0.0325           |
| Purple, Type II  |                 |                 |                 | 0.0683           |
| Yellow, Type II' | NA              | NA              | NA              | NA               |

| 5-residue Turns |        |        |        |                  |        |                  |        |
|-----------------|--------|--------|--------|------------------|--------|------------------|--------|
|                 | Orange | Pink   | Red    | Green            | Blue   | Yellow           | Purple |
| Orange          |        | 0.0119 | 0.0242 | <b>&lt;1e-04</b> | 0.1394 | <b>&lt;1e-04</b> | 0.1946 |
| Pink            | NA     | NA     | 0.1213 | <b>0.0024</b>    | 0.1792 | <b>&lt;1e-04</b> | 0.258  |
| Red             |        |        |        | <b>&lt;1e-04</b> | 0.0525 | <b>&lt;1e-04</b> | 0.0917 |
| Green           | NA     | NA     | NA     | NA               | 0.0397 | <b>&lt;1e-04</b> | 0.0085 |
| Blue            |        |        |        |                  |        | <b>1e-04</b>     | 0.029  |
| Yellow          | NA     | NA     | NA     | NA               | NA     | NA               | 0.0555 |
| Purple          |        |        |        |                  |        |                  |        |

| 5-residue Loops |        |                  |               |                  |
|-----------------|--------|------------------|---------------|------------------|
|                 | Purple | Bright Green     | Brown         | Blue             |
| Purple          |        | <b>&lt;1e-04</b> | <b>0.0015</b> | <b>&lt;1e-04</b> |
| Bright Green    | NA     | NA               | <b>2e-04</b>  | 0.0173           |
| Brown           |        |                  |               | 0.244            |
| Blue            | NA     | NA               | NA            | NA               |

| 6-residue Turns |      |                  |                  |                  |                  |               |        |
|-----------------|------|------------------|------------------|------------------|------------------|---------------|--------|
|                 | Blue | Green            | Orange           | Red              | Purple           | Yellow        | Pink   |
| Blue            |      | <b>&lt;1e-04</b> | <b>&lt;1e-04</b> | <b>&lt;1e-04</b> | <b>&lt;1e-04</b> | <b>5e-04</b>  | 0.0736 |
| Green           | NA   | NA               | 0.0046           | <b>2e-04</b>     | <b>&lt;1e-04</b> | 0.0084        | 0.0586 |
| Orange          |      |                  |                  | <b>&lt;1e-04</b> | 0.0063           | 0.0296        | 0.0061 |
| Red             | NA   | NA               | NA               | NA               | <b>&lt;1e-04</b> | <b>0.0025</b> | 0.0095 |
| Purple          |      |                  |                  |                  |                  | 0.0146        | 0.0146 |
| Yellow          | NA   | NA               | NA               | NA               | NA               | NA            | 0.1821 |
| Pink            |      |                  |                  |                  |                  |               |        |

**Table S2**

Representative examples of 4-residue strand connectors and the average angles for each cluster.

| Cluster Name     | Number Observed | PDB  | Loop/Turn Sequence ID |      | Avg Phi (i) | Avg Psi (i) | Avg Phi (i+1) | Avg Psi (i+1) | Avg Phi (i+2) | Avg Psi (i+2) | Avg Phi (i+3) | Avg Psi (i+3) |
|------------------|-----------------|------|-----------------------|------|-------------|-------------|---------------|---------------|---------------|---------------|---------------|---------------|
| Green, Type I    | 9               | 3BS0 | L5                    | SQLG | -152.21     | 176.00      | -68.63        | -22.83        | -99.41        | -5.66         | -173.29       | 143.52        |
| Green, Type I    | 80              | 2WJR | T3                    | TKDL | -144.65     | 173.92      | -59.30        | -24.63        | -107.51       | 1.20          | -153.71       | 135.53        |
| Orange, Type I'  | 14              | 2GR7 | L1                    | YQGQ | -127.43     | 124.92      | 54.28         | 39.01         | 82.14         | -1.42         | -105.81       | 150.29        |
| Orange, Type I'  | 40              | 3KVN | T2                    | ENRW | -170.05     | 130.43      | 54.03         | 43.67         | 82.31         | -6.14         | -100.68       | 143.76        |
| Purple, Type II  | 6               | 4D5B | L2                    | EPGY | -146.58     | 171.46      | -54.67        | 124.65        | 79.13         | 2.99          | -150.34       | 143.56        |
| Purple, Type II  | 20              | 3PRN | T7                    | AEGV | -144.74     | 170.91      | -59.22        | 133.05        | 74.26         | 4.08          | -147.94       | 138.41        |
| Red, Unk         | 48              | 5IVA | T4                    | RGDT | -90.07      | -1.91       | -137.92       | -175.06       | -67.85        | -23.66        | -108.28       | -16.16        |
| Yellow, Type II' | 15              | 4RDR | L4                    | AGDA | -109.34     | 105.15      | 61.06         | -117.56       | -97.48        | 3.44          | -108.57       | 143.66        |
| Yellow, Type II' | 64              | 2GSK | T5                    | VGDF | -133.55     | 108.73      | 60.24         | -119.81       | -94.35        | 5.21          | -106.87       | 138.51        |

**Table S3**

Representative examples of 5-residue strand connectors and the average angles for each cluster.

| Cluster Name | Number Observed | PDB  | Loop/Turn Sequence ID |       | Avg Phi (i) | Avg Psi (i) | Avg Phi (i+1) | Avg Psi (i+1) | Avg Phi (i+2) | Avg Psi (i+2) | Avg Phi (i+3) | Avg Psi (i+3) | Avg Phi (i+4) | Avg Psi (i+4) |
|--------------|-----------------|------|-----------------------|-------|-------------|-------------|---------------|---------------|---------------|---------------|---------------|---------------|---------------|---------------|
| Blue (AAL)   | 9               | 4D5B | L1                    | GFNNT | -107.24     | -164.86     | -72.03        | -22.19        | -88.55        | -0.50         | 74.09         | 31.79         | -105.34       | 147.16        |
| Blue (AAL)   | 9               | 5IVA | T8                    | EENGF | -116.74     | 150.64      | -65.10        | -21.26        | -69.05        | -6.76         | 92.30         | 5.86          | -78.38        | 115.07        |
| Brown (PLL)  | 9               | 5FP1 | L1                    | GTDNY | -158.83     | -174.88     | -62.07        | 157.96        | 61.30         | 41.49         | 60.19         | 32.71         | -79.59        | 119.89        |
| Cyan (AAA)   | 17              | 4C00 | L1                    | STDVG | -116.00     | 152.04      | -65.31        | -38.21        | -80.31        | -44.72        | -89.83        | -24.21        | 118.19        | 169.55        |
| Green (ABA)  | 10              | 2FGR | T4                    | DNGPL | -92.76      | 114.48      | -87.94        | -31.33        | -156.42       | -150.37       | -74.41        | -17.73        | -119.56       | -19.39        |
| Orange (BAD) | 44              | 3BRY | T4                    | FNDQL | -98.55      | 10.43       | -129.28       | -177.87       | -66.11        | -23.64        | -109.50       | -17.99        | -131.76       | 126.92        |
| Pink (LLD)   | 13              | 4C00 | T5                    | LYDRH | -117.55     | 120.44      | 58.23         | 36.81         | 62.02         | -5.12         | -118.53       | -27.57        | -111.18       | 130.34        |
| Purple (PLD) | 20              | 3SYS | L5                    | LEDVY | -98.90      | 111.09      | -55.16        | 131.15        | 67.88         | 9.32          | -125.52       | -64.75        | -166.37       | 165.64        |
| Purple (PLD) | 7               | 5FR8 | T1                    | IKDVL | -125.46     | 86.85       | -68.34        | 123.07        | 60.89         | -18.79        | -122.82       | -23.38        | -152.36       | 142.12        |
| Red (GAD)    | 12              | 3OHN | T7                    | LGRST | -109.97     | 94.09       | 67.59         | -149.39       | -95.58        | -9.01         | -105.37       | -17.98        | -142.39       | 151.24        |
| Yellow (PGA) | 8               | 4FSP | T1                    | TEGTL | -62.81      | 146.17      | -81.04        | 148.50        | 117.68        | 177.20        | -59.71        | -29.80        | -120.96       | 131.65        |

**Table S4**

Representative examples of 6-residue strand connectors and the average angles for each cluster.

| Cluster Name  | Number Observed | PDB  | Loop/Turn ID | Sequence | Avg Phi (i) | Avg Psi (i) | Avg Phi (i+1) | Avg Psi (i+1) | Avg Phi (i+2) | Avg Psi (i+2) | Avg Phi (i+3) | Avg Psi (i+3) | Avg Phi (i+4) | Avg Psi (i+4) | Avg Phi (i+5) | Avg Psi (i+5) |
|---------------|-----------------|------|--------------|----------|-------------|-------------|---------------|---------------|---------------|---------------|---------------|---------------|---------------|---------------|---------------|---------------|
| Blue (ABAD)   | 23              | 1QJ8 | T3           | NPMENV   | -97.46      | 114.53      | -77.28        | -14.58        | -119.07       | -179.75       | -64.10        | -17.48        | -108.21       | -11.94        | -134.86       | 114.94        |
| Green (AAAL)  | 24              | 4E1S | L3           | DFSGDN   | -105.54     | 108.34      | -68.92        | -29.98        | -69.70        | -37.92        | -99.90        | -1.99         | 58.84         | 37.94         | -137.94       | 147.54        |
| Green (AADL)  | 21              | 4D5B | T3           | NNDYNM   | -99.67      | 64.27       | -66.04        | 1.88          | -66.89        | -24.14        | -102.06       | 2.77          | 77.08         | 17.52         | -117.14       | 103.46        |
| Orange (BADB) | 13              | 5IVA | T3           | TGLDSR   | -110.00     | 123.17      | -125.94       | 152.46        | -71.73        | -35.08        | -110.66       | -6.54         | -133.70       | 170.35        | -123.34       | 109.49        |
| Pink (ABPL)   | 5               | 3SYS | T3           | RELPLG   | -121.45     | 96.10       | -86.34        | -13.05        | -100.81       | 129.70        | -49.53        | 130.23        | 84.56         | -2.43         | -133.27       | 136.55        |
| Purple (PGAB) | 7               | 4FSO | T1           | TEGALG   | -72.45      | 146.59      | -84.66        | 153.00        | 118.56        | -177.65       | -65.78        | -36.44        | -108.25       | 126.48        | -106.80       | 134.14        |
| Red (LLLA)    | 12              | 5FP1 | T7           | FLDNHL   | -141.68     | 159.59      | 35.27         | 64.89         | 52.15         | 38.84         | 73.92         | 18.42         | -95.64        | -13.28        | -136.35       | 130.90        |
| Yellow (PABA) | 5               | 2IAH | T5           | FNVTDD   | -104.71     | 120.47      | -92.65        | 76.94         | -68.04        | -14.97        | -136.93       | 166.52        | -81.08        | -35.99        | -104.09       | -18.23        |
